# Supplementary material for: Hematology and blood pH reference intervals for wild Spiny Butterfly Rays (Gymnura altavela) in the Canary Islands
Source: Research Square preprint supplement (doi:10.21203/rs.3.rs-7657953/v1), 2025-10-21
Supplement: Supplementary file 1 [file 2b705cead920a203e8e5efb7.pdf]

## Supplementary material

**Table S1:** Hematological reference intervals for free-ranging adult pregnant female Spiny Butterfly Rays.

| Analyte                              | n  | Mean  | SD    | Median | Min  | Max  | RI          | LRL        | URL         |
|--------------------------------------|----|-------|-------|--------|------|------|-------------|------------|-------------|
| <b>PCV (%)</b>                       | 30 | 29.6  | 3.1   | 29     | 25   | 36.5 | 24.0-36.2   | 22.7-25.3  | 34.3-38.2   |
| <b>TS (g/dL)</b>                     | 28 | 8.1   | 0.9   | 7.9    | 6.2  | 9.8  | 6.3-9.9     | 5.8-6.8    | 9.4-10.4    |
| <b>RBC (<math>10^3/\mu L</math>)</b> | 27 | 369.1 | 100.1 | 380    | 110  | 550  | 134.4-578.8 | 84.6-184.2 | 529.0-628.6 |
| <b>WBC (<math>10^3/\mu L</math>)</b> | 27 | 33.7  | 14.1  | 30.5   | 14.5 | 79   | 13.8-55.9   | 11-17      | 49.3-63.1   |
| <b>L (%)</b>                         | 30 | 54.7  | 11.3  | 56     | 39   | 76   | 30.7-78.3   | 25.1-36.7  | 73.1-84.1   |
| <b>M (%)</b>                         | 30 | 2.1   | 1.5   | 2      | 0    | 6    | 0-6         | 0-0        | 6-8         |
| <b>H (%)</b>                         | 30 | 23.7  | 12.7  | 23.5   | 6    | 51   | 5.5-56.7    | 3.5-8.3    | 44.9-70.5   |
| <b>N (%)</b>                         | 30 | 1.6   | 1.9   | 1      | 0    | 8    | 0-8         | 0-0        | 8-12        |
| <b>E (%)</b>                         | 30 | 17.5  | 6.9   | 17     | 6    | 36   | 3.9-31.0    | 0.3-7.5    | 27.5-34.6   |
| <b>B (%)</b>                         | 30 | 0.3   | 0.5   | 0      | 0    | 2    | 0-2         | 0-0        | 2-3         |

n, number of individuals; SD, standard deviation; Min, minimum; Max, maximum; RI, reference intervals;

LRL, 90% confidence interval of the lower reference limit; URL, 90% confidence interval of the upper reference limit; PCV, packed cell volume; TS, total solids in plasma; RBC, red blood cell count; WBC, white blood cell count; L, lymphocyte; M, monocyte; H, heterophil; N, neutrophil; E, eosinophil; B, basophil.

**Table S2:** Descriptive statistic of hematological parameters intervals for free-ranging adult non-pregnant female Spiny Butterfly Rays (n=4).

| Analyte                              | Mean  | SD    | Median | Min | Max |
|--------------------------------------|-------|-------|--------|-----|-----|
| <b>PCV (%)</b>                       | 31    | 1.2   | 31     | 30  | 32  |
| <b>TS (g/dL)</b>                     | 8.5   | 0.8   | 8.7    | 7.4 | 9   |
| <b>RBC (<math>10^3/\mu L</math>)</b> | 446.3 | 205.6 | 467.5  | 210 | 640 |
| <b>WBC (<math>10^3/\mu L</math>)</b> | 32.4  | 14.3  | 30.8   | 18  | 50  |
| <b>L (%)</b>                         | 59.3  | 10.4  | 61     | 45  | 70  |
| <b>M (%)</b>                         | 0.8   | 1     | 0.5    | 0   | 2   |
| <b>H (%)</b>                         | 25    | 9.9   | 21.5   | 18  | 39  |
| <b>N (%)</b>                         | 0.8   | 1     | 0.5    | 0   | 2   |
| <b>E (%)</b>                         | 14.3  | 3.3   | 13     | 12  | 19  |
| <b>B (%)</b>                         | 0     | 0     | 0      | 0   | 0   |

SD, standard deviation; Min, minimum; Max, maximum; PCV, packed cell volume; TS, total solids in plasma; RBC, red blood cell count; WBC, white blood cell count; L, lymphocyte; M, monocyte; H, heterophil; N, neutrophil; E, eosinophil; B, basophil.

**Table S3:** Blood pH reference intervals for free-ranging adult pregnant female Spiny Butterfly Rays.

| <b>Analyte</b> | <b>n</b> | <b>Mean</b> | <b>SD</b> | <b>Median</b> | <b>Min</b> | <b>Max</b> | <b>RI</b> | <b>LRL</b> | <b>URL</b> |
|----------------|----------|-------------|-----------|---------------|------------|------------|-----------|------------|------------|
| <b>pH</b>      | 25       | 7.21        | 0.08      | 7.2           | 7.1        | 7.4        | 7.04-7.37 | 6.99-7.09  | 7.32-7.42  |
| <b>pH*</b>     | 20       | 7.35        | 0.06      | 7.37          | 7.2        | 7.5        | 7.21-7.46 | 7.15-7.26  | 7.43-7.49  |

n, number of individuals; SD, standard deviation; Min, minimum; Max, maximum; RI, reference intervals;

LRL, 90% confidence interval of the lower reference limit; URL, 90% confidence interval of the upper reference limit. pH\* is the pH with temperature correction applied.

**Table S4:** Descriptive statistics of pH values for free-ranging adult non-pregnant female Spiny Butterfly Rays (n=4).

| <b>Analyte</b> | <b>Mean</b> | <b>SD</b> | <b>Median</b> | <b>Min</b> | <b>Max</b> |
|----------------|-------------|-----------|---------------|------------|------------|
| <b>pH</b>      | 7.21        | 0.1       | 7.19          | 7.1        | 7.3        |
| <b>pH*</b>     | 7.34        | 0.05      | 7.32          | 7.3        | 7.4        |

SD, standard deviation; Min, minimum; Max, maximum. pH\* is the pH con temperatura corregida.
